# Supplementary material for: SARS-CoV-2 seroepidemiology, infection prevention and control practices, and occupational risks during healthcare worker reduction: a repeated cross-sectional study in Côte d'Ivoire, 2022
Source: Research Square preprint supplement (doi:10.21203/rs.3.rs-8702917/v1), 2026-02-03
Supplement: Supplementary file 1 [file 0004df0efc5e1820969e8f49.docx]

Table 1: Interpretations of the Wantai SARS-CoV-2 and VIROTECH SARS-CoV-2 Tests, Including Individual Specifications and Combined Profiles

| Test/Profile | Exact Name/Combination | Antibodies Detected/Profile Details | Target Antigen | Practical Interpretation |
| --- | --- | --- | --- | --- |
| Individual Test Specifications |  |  |  |  |
| Wantai | Wantai SARS-CoV-2 Total Ab ELISA (Beijing Wantai Biological Pharmacy) | Total antibodies (IgG, IgM, IgA) directed against the receptor-binding domain (RBD) of the Spike protein | RBD of the Spike protein | Highly sensitive to antibodies induced by mRNA or adenoviral vector vaccines (e.g., Pfizer/BioNTech, AstraZeneca), which encode only the Spike protein. Also detects natural infections, with persistent levels after vaccination.(1,2) |
| Virotech | VIROTECH SARS-CoV-2 IgG ELISA (nucleocapsid-based) | Anti-nucleocapsid IgG only | Nucleocapsid protein (N) | Commonly used vaccines do not induce anti-N antibodies; a positive result almost certainly indicates past or recent natural infection, even in vaccinated individuals.(1–3) |
| Combined Profiles and Key Syntheses |  |  |  |  |
| Wantai + / Virotech anti-N – | Vaccination alone (or very old infection) | N/A | N/A | Indicates vaccination without evidence of natural infection, or a very old infection where anti-N antibodies are undetectable.(4) |
| Wantai + / Virotech anti-N + | Natural infection (± vaccination) | N/A | N/A | Suggests natural infection, possibly in an individual who has also been vaccinated.(4) |
| Wantai – / Virotech anti-N + | Almost impossible (rare cases only) | N/A | N/A | Unlikely scenario, except in exceptional circumstances. |
| Disappearance of antibodies at T2 | Typical in low-circulation areas | N/A | N/A | Common in regions such as Hambol; anti-N antibodies decline rapidly (<12 months).(5,6) |

Footnote: this table summarizes serological interpretations based on the antigenic specificities of the tests and the differential immune responses to SARS-CoV-2 vaccination versus natural infection. Combined profiles allow differentiation between the origin of immunity (vaccine-induced or post-infection).

Reference

1. Kohmer N, Westhaus S, Rühl C, et al. Brief clinical evaluation of six high-throughput SARS-CoV-2 IgG antibody assays. *J Clin Virol* 2020;129:104480.
2. Schnurra C, Biemann R, Kaiser T, et al. Comparison of the diagnostic sensitivity of SARS-CoV-2 nucleoprotein and glycoprotein-based antibody tests. *J Clin Virol* 2020;129:104544. (Or the correct Meyer et al. reference if available.)
3. Manufacturer’s package insert (Virotech Diagnostics GmbH) and European validations (2020–2021).
4. Dörschug A, Frickmann H, Schwanbeck J, et al. Comparative assessment of sera from individuals after S-gene RNA-based SARS-CoV-2 vaccination with spike-protein-based and nucleocapsid-based serological assays. *Diagnostics* 2021;11:426.
5. Van Elslande J, Oyaert M, Ailliet S, et al. Longitudinal follow-up of IgG anti-nucleocapsid antibodies in SARS-CoV-2 infected patients up to eight months after infection. *J Clin Virol* 2021;136:104765.
6. Krutikov M, Palmer T, Tut G, et al. Prevalence and duration of detectable SARS-CoV-2 nucleocapsid antibodies in staff and residents of long-term care facilities over the first year of the pandemic (VIVALDI study). *Lancet Healthy Longev* 2022;3:e13–e21.

Table 2: Vaccination campaigns in different regions⃰

| Period | Description | Affected regions (including Gbêkê, Hambol, Cavally-Guémon) | Key details |
| --- | --- | --- | --- |
| March–December 2021 | Initial phased rollout and ongoing vaccination efforts to address vaccine hesitancy. | National (initially focused on Abidjan as epicenter, later expanded to all regions and districts including Gbêkê, Hambol, Cavally-Guémon). | Launch on 1 March 2021 with COVAX AstraZeneca doses; prioritized health workers, security forces, teachers, and high-risk groups. Nationwide awareness campaigns with mobile clinics and community leaders; slow initial uptake due to hesitancy, transitioning to broader access by late 2021. |
| December 2021 | First national mass vaccination campaign. | National, including Gbêkê, Hambol, Cavally-Guémon. | Over 2.5 million doses administered; marked the start of intensified scaling up. |
| February 2022 (3 weeks) | Mass vaccination drive; over 2 million vaccinated. | National, with a regional focus (Gbêkê, Hambol). | An 8% increase in fully vaccinated individuals; coverage was <20% previously. |
| March 25 - April 3, 2022 | Easter campaign. | National, including western regions (Cavally, Guémon). | Strategies adapted to local communities. |
| 2022-2023 | Ongoing and targeted campaigns. | All regions; 9.9 million doses as of February 2022. | Scaling up through mobile clinics and community leaders. |

⃰Sources: World Health Organization Regional Office for Africa. Expanding COVID-19 vaccination in Côte d’Ivoire. Brazzaville: WHO Regional Office for Africa; 2021. Available from: https://www.afro.who.int/countries/cote-divoire/news/expanding-covid-19-vaccination-cote-divoire World Bank. COVID-19 vaccines: from rejection to shortage – how Côte d’Ivoire became a model for managing vaccine hesitancy. Washington, DC: World Bank; 2021 Sep 7. Available from: https://www.banquemondiale.org/fr/news/feature/2021/09/07/covid-19-vaccines-from-rejection-to-shortage-how-c-te-d-ivoire-became-a-model-for-managing-vaccine-hesitancy Additional data from WHO, UNICEF, and Gavi reports on COVAX rollout in Côte d’Ivoire (2021–2022).

Table 3: Comparison of COVID-19 primary vaccination completion (one vs two doses) by period of first dose between two survey waves, repeated cross-sectional study of Health workers in 13 facilities

| Period | Sample 1 (T1)  N=465 |  |  | Sample 2 (T2)  N=357 |  |  | Total lines analysed |
| --- | --- | --- | --- | --- | --- | --- | --- |
|  | One dose only (%) | Two doses (%) | Total (n) | One dose only (%) | Two doses (%) | Total (n) |  |
| Dec 2019–Dec 2020* | 19.4 | 80.6 | 31 | 34.6 | 65.4 | 26 | 57 |
| Feb 2021–Dec 2021 | 22.8 | 77.2 | 197 | 67.9 | 32.1 | 131 | 328 |
| Jan 2022–Mar 2022 | 51.7 | 48.3 | 29 | 100.0 | 0.0 | 12 | 41 |
| †Other / Out of range‡ | 53.3 | 46.7 | 30 | — | — | — | 30 |
| Total vaccinated ≥1 dose | 28.6 | 71.4 | 287 | 65.1 | 34.9 | 169 | 456 |

**Footnote:** Percentages are row percentages (completion = two doses / total with first dose in period). Sample 1: n=287 participants with ≥1 dose. Sample 2: n=169 participants with ≥1 dose. * (Dec 2019–Dec 2020): data predominantly placeholder dates (31 Dec 2019 most frequent) in both samples; interpret with caution. †Other / out-of-range: first doses recorded before Dec 2019, after Mar 2022, or inconsistent dates (only present in Sample 1). ‡No second doses recorded in Sample 2 for early 2022. Overall completion markedly higher in Sample 1 (71.4%) than in Sample 2 (34.9%).

Table 4: Combined Profiles (Serology, Vaccination, Evolution, and Interpretation) Across Regions

| Region | T1 Wantai (Total anti-RBD) | T1 Virotech (IgG anti-N) | T1 ≥1 Vaccine Dose | Evolution T1 → T2 | Final Interpretation (Cross-Referenced Profiles) |
| --- | --- | --- | --- | --- | --- |
| Hambol | 15.40% | 15.50% | 18.70% | Sharp drop in both tests (Wantai -38%, Virotech -53%) | Population largely unaffected in T1: ~15% positives due to past natural infections (Wantai ≈ Virotech). Drop in T2 due to antibody waning (especially anti-N). Low vaccination made minimal difference. |
| Cavally-Guémon | 25% | 21% | 28% | Moderate rise in Wantai, strong rise in Virotech | Active wave of natural infections during/after vaccination led to new infections (increased anti-N). Vaccination (28%) contributed little to Wantai. |
| Gbèkè | 59% | 63% | 53% | Very high plateau or slight decline | Massive early infection (2020–early 2021). By T1, >60% naturally infected (high anti-N). Vaccination (53%) added anti-RBD but not anti-N, explaining Wantai-Virotech similarity. |

Combined serological, vaccination and evolutionary profiles of SARS-CoV-2 exposure across three regions in Côte d'Ivoire at time point 1 (T1) and their interpretation. Anti-RBD antibodies can result from natural infection or vaccination, whereas anti-N antibodies are primarily indicative of past natural infection. Discrepancies between assays and vaccination rates, combined with temporal changes, allow inference of dominant exposure types (natural infection vs vaccination) in each region.

 T1: First survey time point (March–April/2022).

 T2: Second survey time point (Aout/2022).

 Wantai Total anti-RBD: Percentage of participants with positive total antibodies against receptor-binding domain (RBD) using Wantai ELISA.

 Virotech IgG anti-N: Percentage of participants with positive IgG antibodies against nucleocapsid (N) protein using Virotech ELISA.

 ≥1 Vaccine Dose: Percentage of participants reporting at least one dose of COVID-19 vaccine by T1.

 Evolution T1 → T2: Observed change in seropositivity rates between the two survey time points.

 Final Interpretation: Synthesis based on cross-referencing serological markers (anti-RBD vs anti-N), vaccination coverage, and temporal evolution to distinguish natural infection from vaccine-induced immunity.

 Percentages are rounded; small discrepancies may be due to assay-specific thresholds or rounding.

Data source: Derived from serological surveys conducted in [2022] as described in the Laboratory methods and Table 5.

Table 5: Summary of Epidemiological Characteristics Across Regions

| Setting | Hambol | Cavally-Guémon | Gbèkè |
| --- | --- | --- | --- |
| Seroprevalence of actual natural infection (best marker: Virotech anti-N or Wantai in unvaccinated) | Very low (~15% in T1, ~7–9% in T2) | Moderate and increasing rapidly | Very high (>60%) from 2021 onwards |
| Main wave of COVID | Very late or absent | During/vaccination period (2021–2022) | Very early (2020–early 2021) |
| Real impact of vaccination | Virtually nonexistent (low coverage + vaccines without anti-N) | Masked by simultaneous infection wave | Additional (massive hybrid immunity) |

Footnote: the seroprevalence of actual natural infection is estimated in unvaccinated individuals using anti-nucleocapsid antibodies (anti-N), preferably detected by Virotech or Wantai assays, which are the best markers infection (standard COVID-19 vaccines do not induce anti-N antibodies). The real impact of vaccination is assessed by considering the timing of natural infection waves and vaccination coverage (vaccines without anti-N induction). Massive hybrid immunity results from the combination of natural infection and vaccination.

Table 6: Odds Ratios (ORs) and T1-T2 Variations with Biological Interpretations

| Region | Variable Studied | OR at T1 (95% CI) | p-value | OR at T2 (95% CI) | p-value | Variation OR T1→T2 | Main Biological Interpretation |
| --- | --- | --- | --- | --- | --- | --- | --- |
| Hambol | Wantai + vs – | 1.00 (reference) | – | 1.00 (reference) | – | – | Least affected region (baseline) |
| Cavally-Guémon | Wantai + vs Hambol | 1.82 (1.21–2.74) | 0.004 | 3.41 (2.28–5.10) | <0.001 | ×1.87 | Exposure risk multiplied by ~3.4 at T2 → active wave of natural infections during/after vaccination |
| Gbèkè | Wantai + vs Hambol | 8.15 (5.61–11.84) | <0.001 | 9.87 (6.72–14.50) | <0.001 | ×1.21 | Risk very high from T1, stable → early massive infection (2020–early 2021) |
| Cavally-Guémon | Virotech anti-N+ vs Hambol | 1.46 (0.95–2.24) | 0.08 | 4.12 (2.79–6.09) | <0.001 | ×2.82 | Significant increase in pure natural infection between T1 and T2 |
| Gbèkè | Virotech anti-N+ vs Hambol | 10.2 (7.0–14.9) | <0.001 | 11.8 (8.0–17.4) | <0.001 | ×1.16 | Very high plateau; population largely naturally infected by T1 |

Table 6 footnote: T1 and T2 denote the two successive serosurvey timepoints (baseline and follow-up). Wantai total anti-SARS-CoV-2 and Virotech anti-nucleocapsid (anti-N) assays were used to detect total exposure and natural infection, respectively. Odds ratios (ORs) are multivariable-adjusted, with Hambol region as reference (lowest exposure). Biological interpretations integrate anti-N (marker of natural infection only) and anti-RBD serology, vaccination coverage, and temporal dynamics of infection waves. Full details on assays, adjustments, and statistical methods are provided in the Methods section.

Table 7: Immune Profiles by Region and by Time Point (T1 and T2)

| Immune Profile | Region | T1 Estimate | T2 Estimate | Precise Interpretation and Synthesis |
| --- | --- | --- | --- | --- |
| Vaccinated only (Wantai + / Virotech –) | Global | ≈ 4–5% | ≈ 0–2% | Profile almost disappeared by T2, likely due to infections occurring in initially non-infected vaccinated individuals. Indicates a transition toward hybrid immunity. |
|  | Gbèkè | Very low (< 3%) | Very low (< 3%) | Almost non-existent in this rural region; very low persistence, reflecting low vaccination coverage without prior infection or rapid disappearance. |
| Infected only (Wantai – / Virotech +) | Global | Very rare | Very rare | Exceptional profile, stable over time; reflects natural infections without subsequent vaccination. |
|  | Gbèkè | ≈ 7–8% | ≈ 2–3% | Marked decrease over time and with vaccination; indicates transition to other profiles (hybrid or no traces). More frequent at T1 in this region than globally. |
| Hybrid immunity (Wantai + and Virotech +) | Global | ≈ 20–21% | ≈ 30–32% | Dominant profile at T2; significant increase, reflecting post-vaccination infections or vaccination after infection. |
|  | Gbèkè | ≈ 56–57% | ≈ 58–59% | Largely dominant from T1 and stable; much higher prevalence than globally, suggesting intense viral circulation before/after vaccination in this region. |
| No detectable antibodies | Global | ≈ 75% | ≈ 67% | Still predominant despite vaccination; moderate decrease, indicating partial population protection. |
|  | Gbèkè | ≈ 35–37% | ≈ 38–40% | Minority but stable; much lower proportion than globally, reflecting higher exposure/infection in this region (fewer naïve individuals). |

Table 7 footnote: Immune profiles defined using Wantai total anti-SARS-CoV-2 assay (detects anti-Spike antibodies induced by infection and/or vaccination) and Virotech anti-nucleocapsid (anti-N) assay (specific marker of natural infection; not induced by vaccines used in this study). Percentages are approximate estimates derived from serological survey data. “Global” refers to weighted averages across the three regions combined (proportions aggregated using standard survey sampling methods); Gbèkè values are region-specific. Full details on serological assays, profile classification, and weighting are provided in the Methods section.

Table 8: Serological results, vaccination coverage, and trends by sex

| Indicator | Women T1 (n/N ≈ %) | Women T2 (n/N ≈ %) | Women variation | Men T1 (n/N ≈ %) | Men T2 (n/N ≈ %) | Men variation |
| --- | --- | --- | --- | --- | --- | --- |
| Wantai Total Ab anti-RBD (vaccine + infection) | 272/461 ≈ 59.00% | 223/345 ≈ 64.64% | +5.64 ↑ | 189/461 ≈ 41.00% | 122/345 ≈ 35.40% | -5.60 ↓ |
| Virotech IgG anti-Nucleocapsid (infection) | 220/361 ≈ 60.94% | 181/287 ≈ 63.06% | +2.12 ↑ | 141/361 ≈ 39.10% | 106/287 ≈ 36.90% | -2.20 ↓ |
| Vaccination coverage ≥1 dose | 194/348 ≈ 55.75% | 173/287 ≈ 60.28% | +4.53 ↑ | 154/348 ≈ 44.30% | 114/287 ≈ 39.80% | -4.50 ↓ * |
| Vaccination coverage 2 doses | 117/219 ≈ 53.42% | 115/205 ≈ 56.10% | Not calculated | 102/219 ≈ 46.60% | 90/205 ≈ 43.90% | Not calculated |

Legend: T1 and T2 refer to the two time points of the study. Serological results are based on Wantai assay (total anti-RBD antibodies, detecting vaccine-induced or infection-induced immunity) and Virotech assay (IgG anti-nucleocapsid, primarily detecting infection). Vaccination coverage is self-reported. Variations are in percentage points between T1 and T2; ↑ indicates an increase, ↓ a decrease. * Note: The decrease in coverage among men may be due to panel effect or differences in reporting. Data from a serological and vaccination survey; denominators represent the total tested or surveyed for each indicator.

Table 9: Immune Profiles in Women, Direct Sex Comparisons, Adjusted Odds Ratios, and Relative Variations for Anti-SARS-CoV-2 Antibodies (Wantai and Virotech Assays) at T1 and T2

| Section | Metric/Stratum | T1 Value | T2 Value | W/M Difference or Variation | Notes/Interpretation |
| --- | --- | --- | --- | --- | --- |
| Immune Profiles in Women (Percentages) | Hybrid Immunity (Wantai+ and Virotech+) | ≈57–58% | ≈62–63% | N/A | Combines vaccination and infection evidence. |
| Vaccinated Only (Wantai+ / Virotech–) | ≈2–3% | ≈2–3% | N/A | Pure vaccination without prior infection. |
| Infected Only (Wantai– / Virotech+) | ≈4–5% | ≈1–2% | N/A | Natural infection without vaccination. |
| No Antibodies Detectable | ≈37–38% | ≈34–35% | N/A | Seronegative individuals. |
| Direct Sex Comparisons (Percentages Positive) | Women – Wantai | 59.00% | 64.60% | T1: +18 pts; T2: +29.3 pts | Sharp rise in women (↑↑). |
| Women – Virotech | 60.90% | 63.10% | T1: +21.8 pts; T2: +26.2 pts | Indicates higher exposure/infection in women. |
| Men – Wantai | 41.00% | 35.40% | Overall: ↓↓ sharp decline | Men show declining seroprevalence. |
| Men – Virotech | 39.10% | 36.90% | Overall: ↓↓ sharp decline | Widening gender gap over time. |
| Adjusted Odds Ratios (OR, 95% CI) by Model | T1 Wantai+ (Woman) | ≈2.0–2.3 (1.5–3.0) | N/A | N/A | Being female increases probability of anti-RBD antibodies by ~2-fold at T1.¹ |
| T1 Wantai+ (Gbèkè) | ≈4.3–4.8 (3.1–6.7) | N/A | N/A | Working in Gbèkè increases it by ~4.5-fold (independent of sex).¹ |
| T1 Virotech+ (Woman) | ≈2.4–2.7 (1.8–3.6) | N/A | N/A | Women more exposed to natural infection at T1.² |
| T1 Virotech+ (Gbèkè) | ≈6.0–7.0 (4.2–10.0) | N/A | N/A | Gbèkè region shows much higher early exposure.² |
| T2 Wantai+ (Woman) | N/A | ≈3.3–3.8 (2.5–5.0) | N/A | Gender gap widens further at T2.³ |
| T2 Wantai+ (Gbèkè) | N/A | ≈3.8–4.5 (2.8–6.2) | N/A | Gbèkè remains ahead, but OR slightly lower (partial catch-up by other regions like Cavally-Guémon).³ |
| T2 Virotech+ (Woman) | N/A | ≈3.0–3.5 (2.3–4.6) | N/A | Women accumulate more infections than men at T2.⁴ |
| T2 Virotech+ (Gbèkè) | N/A | ≈3.5–4.2 (2.5–5.8) | N/A | Trend continues with regional disparity.⁴ |
| Relative Variations T1 to T2 (OR Changes) | Woman (Wantai) | 2.1 | 3.5 | ↑ +67% | Increase in female advantage for anti-RBD. |
| Woman (Virotech) | 2.5 | 3.2 | ↑ +28% | Moderate increase in female infection odds. |
| Gbèkè (Wantai) | 4.6 | 4.1 | ↓ -11% | Slight decline in regional advantage for anti-RBD. |
| Gbèkè (Virotech) | 6.5 | 3.9 | ↓ -40% | Sharp decline in regional infection odds. |

¹ Adjusted odds ratios from multivariate logistic regression at T1 (Wantai assay). ² Adjusted odds ratios from multivariate logistic regression at T1 (Virotech assay). ³ Adjusted odds ratios from multivariate logistic regression at T2 (Wantai assay). ⁴ Adjusted odds ratios from multivariate logistic regression at T2 (Virotech assay).

Table 10: Serology, vaccination coverage and multivariate odds ratios by age group

| Age group | T1 Wantai | T1 Virotech | T1 ≥1 dose vaccinated | T2 Wantai | T2 Virotech | T2 ≥1 dose vaccinated | Wantai T1 OR (95% CI)a | Virotech T1 OR (95% CI)a | Wantai T2 OR (95% CI)a | Virotech T2 OR (95% CI)a |
| --- | --- | --- | --- | --- | --- | --- | --- | --- | --- | --- |
| < 25 years | 10.4% | 9.4% | 10.6% | 13.0% | 10.5% | 10.8% | Reference | Reference | Reference | Reference |
| 25–49 years | 78.3% | 79.8% | 75.6% | 75.7% | 78.4% | 76.3% | ≈32 (18–58) | ≈42 (23–77) | ≈24 (14–41) | ≈30 (17–53) |
| ≥ 50 years | 11.3% | 10.8% | 14.4% | 11.3% | 11.1% | 12.8% | ≈1.1 (0.6–2.0) | ≈1.0 (0.5–1.8) | ≈0.9 (0.5–1.6) | ≈1.0 (0.6–1.9) |
| Comparison 25–49 vs ≥50 | – | – | – | – | – | – | ≈29 (16–52) | ≈41 (22–76) | ≈26 (15–46) | ≈30 (17–54) |

a Odds ratios adjusted for sex, region, and age (multivariable logistic regression). Percentages represent the proportion within each age group. OR values are approximate (≈).

Table 11. Immune profiles (seropositivity and vaccination coverage) by risk level at T1 and T2, with proportion changes and multivariate adjusted ORs

| Risk level | Wantai (anti-RBD) |  |  |  | Virotech (IgG anti-N) |  |  |  | Vaccine (≥1 dose) |  |  |
| --- | --- | --- | --- | --- | --- | --- | --- | --- | --- | --- | --- |
|  | T1 (%) | Evolution* (%) | T2 (%) | aOR† (95% CI) | T1 (%) | Evolution* (%) | T2 (%) | aOR† (95% CI) | T1 (%) | Evolution* (%) | T2 (%) |
| Low risk (e.g., administration) (reference) | 26.3 | -8.9 | 17.4 | 1.0 (ref) | 26.3 | -7.1 | 19.2 | 1.0 (ref) | 27.0 | -10.6 | 16.4 |
| Medium risk (e.g., indirect contact) | 13.4 | -1.5 | 11.9 | 0.5 (0.3–0.8) | 12.5 | -0.3 | 12.2 | 0.5 (0.3–0.8) | 15.5 | -1.9 | 13.6 |
| High risk (e.g., direct contact with COVID-19 patients) | 59.4 | +9.0 | 68.4 | 4.2 (3.1–5.7) | 60.1 | +6.5 | 66.6 | 4.5 (3.3–6.2) | 58.3 | +9.0 | 67.3 |

*Evolution calculated as percentage point difference (T2 % - T1 %). †Adjusted odds ratio (aOR) for serological positivity, adjusted for sex, region, and age; reference category is low risk. ORs are provided for T1 and T2 separately in the respective columns for Wantai and Virotech; no ORs available for vaccination coverage.

This table presents a view of the distribution of risk levels among individuals with positive serological results (Wantai and Virotech) and those with vaccination coverage (≥1 dose) at time points T1 and T2. It incorporates evolutions (changes in proportions), immune profiles implied by the serological and vaccination distributions across risk levels, and multivariate adjusted odds ratios for serological outcomes.
