# Supplementary material for: SARS-CoV-2 seroepidemiology, infection prevention and control practices, and occupational risks during healthcare worker reduction: a repeated cross-sectional study in Côte d'Ivoire, 2022
Source: Research Square preprint supplement (doi:10.21203/rs.3.rs-8702917/v1), 2026-02-03
Supplement: Supplementary file 2 [file 202fce1156f276db02bfee52.docx]

Healthcare workers (administrative staff and trainees/interns)

Observed attendance

n2 = 357

Rate: 37.6%

Observed attendance

n1 = 465

Rate: 47.1%

Expected attendance (based on literature 14–49% absenteeism): 51–86%

T2 (August 2022)

N2 = 946

*N2’~3 estimated*

T1 (March–April 2022)

N1 = 900

*N1’~87 estimated*

Health staff who participated solely at sampling times T1 and T2

n’1=302

n’2=194

Health staff who took part in both sample periods

n’’1=163

n’’1=163

Health trainee staff who participated solely at sampling times T1 and T2

*Trainee participants (n=41 at T1), representing a calculated source population of N≈87 (Multiplier Method).*

*Trainee participants (n=1 at T2), representing a calculated source population of N≈3 (Multiplier Method).*

Justification for the absence (interviews results) of healthcare staff who participated solely in the sampling at time T1 but were missing at time T2

*Annual vacation: 86(28.48%); Absence:* *164(54.30%)*, *School and university holidays: 41(13.58%); Leave and reassignment: 9(2.98%); Refusal: 2(0.66%)*

Figure 1: flow diagram of healthcare worker participation in the BCHW study at T1 and T2 in 13 facilities in Côte d'Ivoire

**Footnote**

Flow diagram of participants at the two measurement times (T1 and T2). The source population included administrative staff (N=900 at T1 [March–April 2022]; N=946 at T2 [August 2022]); trainees/interns were excluded due to incomplete records. Expected attendance was based on reported absenteeism rates in Sub-Saharan Africa (14–49%).¹ Attendance rates were weighted by post-stratification adjustment for estimated regional absence frequencies². The numbers correspond to persons physically present on the day of observation. Absentees include: annual leave, sick leave, external training, official missions and other justified reasons (not exhaustively listed). The total number of trainees/interns across the 13 facilities was estimated using the service multiplier method (benchmark multiplier approach), taking the observed attendance rate among administrative staff (known workforce: 900 at T1 and 946 at T2) as the reference proportion3,4. Results: ≈81 trainees/interns at T1 and ≈3 at T2 consistent with a high turnover of trainees.

¹ Klootwijk et al. (reference 13 in manuscript). ² Kolenikov S. Survey Practice 2016;9(3). doi:10.29115/SP-2016-0014. 3Johnston LG, et al. Sex Transm Dis 2013;40:304–10. 4Chabata ST, et al. JMIR Public Health Surveill 2020;6:e15044.

Estimation of trainee/interns numbers

We applied the multiplier method (specifically, a benchmark multiplier approach) to estimate the total number of trainees/interns affiliated with the institution, using the observed attendance rate among administrative staff as the benchmark proportion1, 2, 3.

We estimated the number of trainee/interns using the observed data in the sample, under the reasonable assumption that the attendance (or participation) rate is similar between administrative staff (whose number is known) and trainees/interns at each time point. This assumption is plausible for T1 (initial sampling), as there is no indication of differentiated systematic bias at this stage. For T2, it is less reliable due to the high turnover of trainee/interns, but it still allows for a consistent estimate.

Calculate the proportion of trainee/interns in the sample:

- This proportion reflects, under the assumption of an identical attendance rate, the proportion in the total source population (administrative staff and trainee/interns).

At T1: P = 41/465 = 0.088 (8.82 %)

At T2: P = 1/357 = 0.0028 (0.28%)

- Estimate the number of trainees (S) in the source population:

The formula is derived from the equation

P = S / (A + S), where A is the number of known administrative staff (900 at T1, 946 at T2).

Solution for S: S = (P × A) / (1 - P)

At T1: S = (0.088 × 900) / (1 - 0.088) = 79.2 / 0.912 = 87; estimate of approximately 87 trainees in the source population of the 13 establishments.

At T2: S= (0.0028×946)/ (1-0.0028) =2.65/0.9972=3; an estimate of approximately three interns in the source population of the 13 establishments, which is consistent with a high turnover rate. This indicates that the interns are temporary and that their number varies over time.

1Johnston LG, Prybylski D,Raymond HF, Mirzazadeh A, Manopaiboon C, McFarland Incorporating the service multiplier method in respondent-driven sampling surveys to estimate the size of hidden and hard-to-reach population: case studies from around the world. Sexually Transmitted Diseases, 2013 Apr; 40(4):304-310. DOI: 10.1097/OLQ.0b013e31827fd650 PMI: 23486495

2UNAIDS/WHO Working Group on Global HIV/AIDS and STI Surveillance. Guidelines on Estimating the size of Populations Most at risk to HIV. Genève: World Health Organization, 2010.

Available Online: <https://data.unaids.org/pub/manual/2010/guidelines_popnestimationsize_en.pdf>

3Chabata ST, Fearon E, Webb EL, Weiss HA, Hargreaves JR, Cowan FM. Assessing Bias in Population Size Estimates Among Hidden Populations When Using the Service Multiplier Method Combined With Respondent-Driven Sampling Surveys: Survey Study. JMIR Public Health and Surveillance, 2020 Jun; 6(2):e15044. DOI: 10.2196/15044
