# Supplementary material for: SARS-CoV-2 seroepidemiology, infection prevention and control practices, and occupational risks during healthcare worker reduction: a repeated cross-sectional study in Côte d'Ivoire, 2022
Source: Research Square preprint supplement (doi:10.21203/rs.3.rs-8702917/v1), 2026-02-03
Supplement: Supplementary file 3 [file c67e7ec3c100f7ca85b1fad6.docx]

Table 1: Regional demographics and distribution of participants

| Variable | Catégorie | T1 PR S2 % (95% IC) | T1 OR (95% CI) p-value | T2 PR S2 % (95% IC) | T2 OR (95% CI) p-value | VR PR (%) T2 vs T1 | VR OR (%) T2 vs T1 |
| --- | --- | --- | --- | --- | --- | --- | --- |
| Region | Cavally Guemon | 62.4 (53.4-70.6) | 6.4 (3.99-10.29) <0.001 | 70.9 (61.5-78.8) | 19.67 (10.79-35.86) <0.001 | +13.6 | +207.3 |
|  | Gbeke | 20.6 (16.2-25.7) | Ref. | 11.0 (7.5-15.9) | Ref. | -46.6 | — |
|  | Hambol | 59.2 (47.5-69.8) | 5.59 (3.21-9.74) <0.001 | 69.4 (53.1-82.0) | 18.37 (8.04-41.97) <0.001 | +17.2 | +228.6 |
| Sex | Female | 29.7 (24.6-35.3) | 2.09 (1.42-3.07) <0.001 | 28.0 (22.6-34.1) | 2.15 (1.37-3.39) <0.001 | -5.7 | +2.9 |
|  | Male | 46.9 (39.9-53.9) | Ref. | 45.6 (37.1-54.3) | Ref. | -2.8 | — |
| Age group (years old) | [18;25[ | 25.0 (14.9-38.8) | 1.82 (0.92-3.62) 0.086 | 17.8 (9.3-31.3) | 2.65 (1.19-5.91) 0.018 | -28.8 | +45.6 |
|  | [25;49[ | 37.8 (33.0-42.9) | Ref. | 36.4 (30.9-42.3) | Ref. | -3.7 | — |
|  | [49;50[ | 55.6 (26.7-81.1) | 0.49 (0.13-1.84) 0.289 | 33.3 (6.1-79.2) | 1.14 (0.10-12.78) 0.913 | -40.1 | — |
|  | [50; + [ | 38.6 (25.7-53.4) | 0.97 (0.51-1.84) 0.915 | 37.8 (24.1-53.9) | 0.94 (0.46-1.91) 0.865 | -2.1 | — |
| Professions | Administrative | 32.9 (23.6-43.9) | 1.47 (0.15-14.25) 0.74 | 44.4 (29.5-60.4) | 0.64 (0.15-2.78) 0.552 | +35.0 | — |
|  | Medical | 16.0 (6.4-34.7) | 0.6 (0.05-7.35) 0.69 | 33.3 (15.2-58.3) | 0.4 (0.07-2.15) 0.29 | +108.1 | — |
|  | Paramedical | 36.0 (30.7-41.6) | 1.68 (0.17-16.4) 0.65 | 27.0 (21.9-32.9) | 0.3 (0.08-1.14) 0.077 | -25.0 | — |
|  | Support staff | 54.5 (42.6-66.0) | 3.6 (0.36-36.44) 0.27 | 56.6 (43.3-69.0) | 1.04 (0.25-4.33) 0.953 | +3.9 | — |
| Occupational risk group | High risk | 30.9 (25.8-36.6) | 1.35 (0.14-13.17) 0.796 | 27.6 (22.3-33.5) | 0.3 (0.08-1.17) 0.083 | -10.7 | — |
|  | Medium risk | 53.2 (41.0-65.1) | 3.41 (0.34-34.65) 0.299 | 39.5 (26.4-54.4) | 0.52 (0.12-2.23) 0.896 | -25.8 | — |
|  | Low risk | 42.6 (34.2-51.5) | 2.23 (0.23-22.04) 0.493 | 53.2 (41.0-65.1) | 0.91 (0.22-3.71) 0.381 | +24.9 | — |

Participant characteristics and odds ratios from logistic regression models comparing level 2 (S2) to level 1 (S1) health facilities in two time periods

S1 = level 1 health facilities; S2 = level 2 health facilities.

Model 1 (T1, N=465) and Model 2 (T2, N=357): logistic regression (bivariate or multivariable as specified in text), S2 versus S1 (reference = S1).

Ref. = reference category.

PR: Relative prevalence

Table 2: Analysis of the relationships between HHM adherence and healthcare facility levels of care with relative prevalences [PR], relative variations of PR [VR PR], and relative variations of OR1/OR2 [VRs])

| Variable hand hygiene times | Compliance | Frequencies S1 T1 | Frequencies S2 T1 | OR1 (95%CI) | P value T1 (Wald test) | PR1 | Frequencies S1 T2 | Frequencies S2 T2 | OR2 (95%CI) | P value T2 (Wald test) | PR2 | VR PR | VRs |
| --- | --- | --- | --- | --- | --- | --- | --- | --- | --- | --- | --- | --- | --- |
| Before touching a patient | Complete | 110(37.41%) | 93(54.07%) | 0.78(0.41,1.46) | 0.43 | 1.45 | 84(35.74%) | 69(56.56%) | 0.66(0.25,1.76) | 0.40 | 1.58 | 0.09 | -0.15 |
| Average | 88(29.9%) | 21(12.21%) | 0.22(0.1,0.46) | <0.001 | 0.41 | 59(25.11%) | 19(15.57%) | 0.26(0.09,0.75) | 0.012 | 0.62 | 0.52 | 0.18 |
| Weak | 73(24.83%) | 33(19.19%) | 0.42(0.21,0.84) | 0.014 | 0.77 | 84(35.74%) | 24(19.67%) | 0.23(0.08,0.64) | 0.005 | 0.55 | -0.29 | -0.45 |
| After touching a patient | Complete | 139(47.28%) | 115(66.86%) | 0.9(0.48,1.67) | 0.736 | 1.41 | 102(43.40%) | 82(67.21%) | 0.67(0.28,1.63) | 0.377 | 1.55 | 0.10 | -0.26 |
| Average | 76(25.85%) | 16(09.30%) | 0.23(0.1,0.5) | <0.001 | 0.36 | 52(22.13%) | 15(12.29%) | 0.24(0.09,0.66) | 0.006 | 0.56 | 0.54 | 0.04 |
| Weak | 54(18.37%) | 18(10.46%) | 0.36(0.17,0.79) | 0.011 | 0.57 | 71(30.21%) | 13(10.66%) | 0.15(0.05,0.43) | <0.001 | 0.35 | -0.38 | -0.58 |
| Before an aseptic procedure | Complete | 116(39.46%) | 88(51.16%) | 0.31(0.16,0.59) | <0.001 | 1.30 | 86(36.60%) | 65(53.28%) | 0.26(0.12,0.57) | <0.001 | 1.46 | 0.12 | -0.16 |
| Average | 96(32.65%) | 16(09.30%) | 0.07(0.03,0.15) | <0.001 | 0.28 | 55(23.40%) | 12(09.84%) | 0.08(0.03,0.19) | <0.001 | 0.42 | 0.48 | 0.14 |
| Weak | 66(22.45%) | 29(16.86%) | 0.18(0.09,0.37) | <0.001 | 0.75 | 84(35.74%) | 16(13.11%) | 0.07(0.03,0.16) | <0.001 | 0.37 | -0.51 | -0.61 |
| After an aseptic procedure | Complete | 144(48.98%) | 95(55.23%) | 0.24(0.12,0.47) | <0.001 | 1.13 | 99(42.13%) | 76(62.29%) | 0.32(0.15,0.7) | 0.004 | 1.48 | 0.31 | 0.33 |
| Average | 75(25.51%) | 14(08.14%) | 0.07(0.03,0.16) | <0.001 | 0.32 | 52(22.13%) | 12(09.84%) | 0.1(0.04,0.25) | <0.001 | 0.44 | 0.39 | 0.43 |
| Weak | 61(20.75%) | 25(14.53%) | 0.15(0.07,0.333) | <0.001 | 0.70 | 73(31.06%) | 8(06.56%) | 0.05(0.02,0.13) | <0.001 | 0.21 | -0.70 | -0.67 |
| After contact with bodily fluids | Complete | 169(57.48%) | 124(72.09%) | 0.34(0.16,0.7) | 0.003 | 1.25 | 122(51.91%) | 94(77.05%) | 0.53(0.22,1.3) | 0.167 | 1.48 | 0.18 | 0.56 |
| Average | 61(20.75%) | 11(06.39%) | 0.08(0.03,0.21) | <0.001 | 0.31 | 37(15.74%) | 12(09.84%) | 0.22(0.08,0.66) | 0.006 | 0.63 | 1.03 | 1.75 |
| Weak | 52(17.69%) | 11(06.39%) | 0.1(0.04,0.25) | <0.001 | 0.36 | 67(28.51%) | 3(02.46%) | 0.03(0.01,0.13) | <0.001 | 0.09 | -0.76 | -0.70 |

Notes: All values remain as in the original table. Percentages use dot notation for decimals (original commas treated as decimal points). PR (relative prevalence) = (prevalence S2 / prevalence S1). VR PR = (PR2 - PR1) / PR1. VRs (VR_OR) = (OR2 - OR1) / OR1. PR values rounded to 2 decimals; VR values rounded to 2 decimals for simplicity. Statistically significant P values (<0.05) are as indicated in the original. S1: primary-level (reference); S2: secondary-level.
