# Supplementary material for: SARS-CoV-2 seroepidemiology, infection prevention and control practices, and occupational risks during healthcare worker reduction: a repeated cross-sectional study in Côte d'Ivoire, 2022
Source: Research Square preprint supplement (doi:10.21203/rs.3.rs-8702917/v1), 2026-02-03
Supplement: Supplementary file 4 [file f9737e83ec631ec0f7e7a90a.docx]

Table 1. Profession risk variable with regard to potential COVID-19 exposure risk during patient
contact

| Profession risk category | Healthcare professional group |
| --- | --- |
| High risk - Close and protracted patient contact | Medical doctor, doctor in residency, registered nurse (or equivalent), Midwife, assistant nurse, nurse technician (or equivalent), community health care worker, physiotherapist/occupational therapist/speech and language therapist, phlebotomist |
| Medium risk - Paramedical personnel and other staff with patient contact or indirect contact via body fluids/surfaces | Patient transporter, cleaner, pharmacist, pharmacy technician, nutritionist/dietitian, lab personnel, laundry staff, radiology/x-ray technician, admission/reception clerk, psychologist/counsellor, medical assistant, student |
| Low risk - Paramedical personnel and other staff with distanced or unclear patient contact | Administrative employee, secretary of department, driver, catering staff, security, technician/maintenance personnel, "community mediator" |

This classification is based on the nature and duration of patient contact, as well as the potential for exposure to body fluids or contaminated surfaces. High-risk categories involve close and prolonged direct contact; medium-risk categories include indirect contact or handling of body fluids; low-risk categories involve distanced, occasional, or unclear patient contact. This risk stratification was adapted for use in the study to assess occupational exposure among healthcare workers. Equivalents in other health systems may vary.

Table 2. Classification of public healthcare facilities in Côte d’Ivoire by level and type of care, according to the national health pyramid⃰

| Public | |
| --- | --- |
| Level of care | Type of care |
| Tertiary | reference hospital (University Hospital Center) |
| Secondary | General and regional hospitals |
| Primary non hospital | Center of urban health protection, maternal and child health centres |

This classification reflects the pyramidal structure of the public health system in Côte d’Ivoire, with three main levels of care: tertiary (specialized referral care provided by University Hospital Centers), secondary (general and regional hospitals offering intermediate care), and primary non-hospital (first-contact facilities including urban health protection centers and maternal and child health centers). This stratification was used in the study to categories healthcare facilities in the study setting. Equivalents and nomenclature may vary across different health systems. Adapted from the national health pyramid as described in official documents from the Ministry of Health of Côte d’Ivoire.

⃰ Plan national de développement PND 2021-2025. Available from: <https://dcf.ci/dcf.ci/wp-content/uploads/2021/09/PND-2021-2025_Tome-1_Diagnostic-strate%CC%81gique.pdf>. 2021.
